# Supplementary material
Source: publisher figshare collection journal article supplement (https://acs.figshare.com/ndownloader/files/4523641)
Supplement: Supplementary file 1 [file 4523641]

# Supporting Information

## Electronic structure engineering via on-plane chemical functionalization: A comparison study on two-dimensional polysilane and graphane

Ning Lu, Zhenyu Li, and Jinlong Yang  
zyli@ustc.edu.cn

**Table S1.** Energies (in eV) of fluorinated gaphane (C-F) and polysilane (Si-F) in different configurations.

|      | 25-a    | 25-b    | 25-c    | 50-a    | 50-b    | 50-c    | 50-d    | 50-e    | 50-f    | 75-a    | 75-b    | 75-c    | 100     |
|------|---------|---------|---------|---------|---------|---------|---------|---------|---------|---------|---------|---------|---------|
| C-F  | -103.12 | -103.48 | -103.57 | -102.11 | -103.34 | -103.53 | -103.44 | -103.02 | -103.13 | -102.39 | -102.63 | -102.74 | -101.29 |
| Si-F | -74.18  | -74.19  | -74.22  | -78.00  | -78.03  | -78.11  | -78.07  | -78.03  | -78.07  | -81.80  | -81.80  | -81.85  | -85.41  |

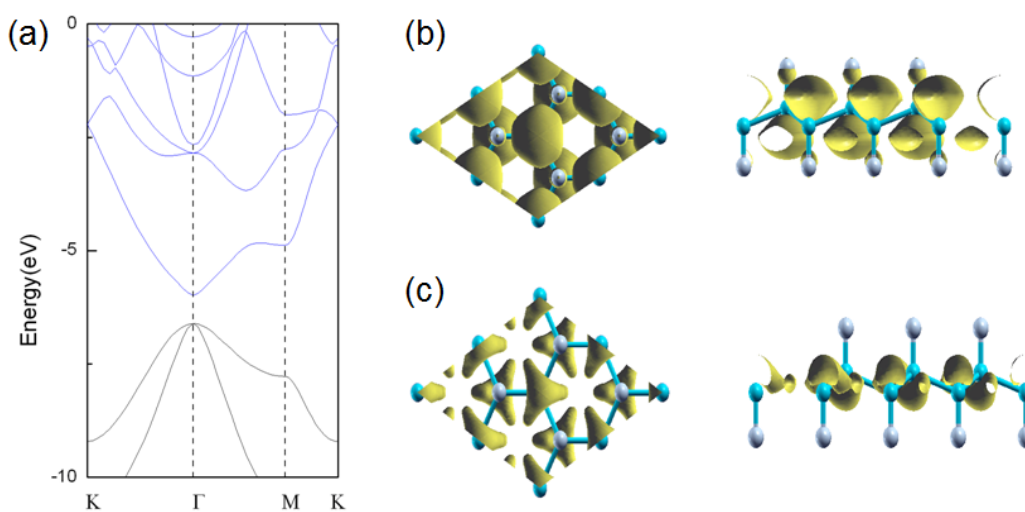

**Figure S1.** (a) Band structure of the 100% fluorinated polysilane using a  $1\times 1$  unit cell. Density of CBM at (b) the  $\Gamma$  point and (c) the M point.

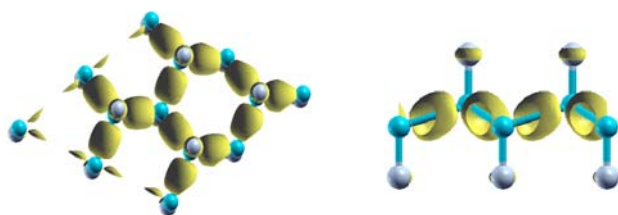

**Figure S2.** Density of VBM for 100% fluorinated planar polysilane.

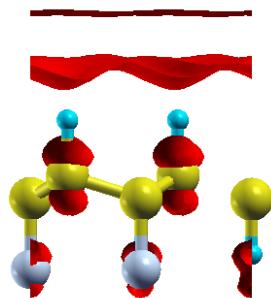

**Figure S3.** Density of CBM of fluorinated graphane (configuration 25-a).

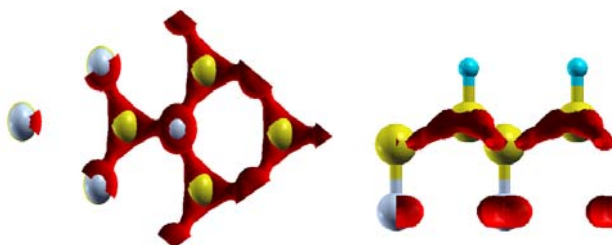

**Figure S4.** Density of VBM of fluorinated graphane (configuration 50-a).

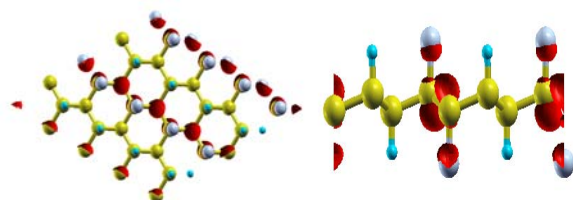

**Figure S5.** Density of CBM of fluorinated graphane (configuration 50-b).

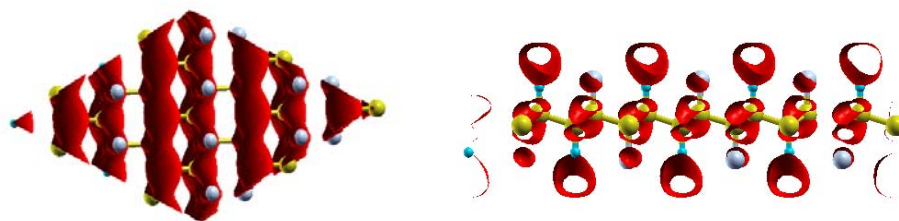

**Figure S6.** Density of conduction band edge (CBE) at the  $\Gamma$  point of 50% fluorinated graphane (configuration 50-c).

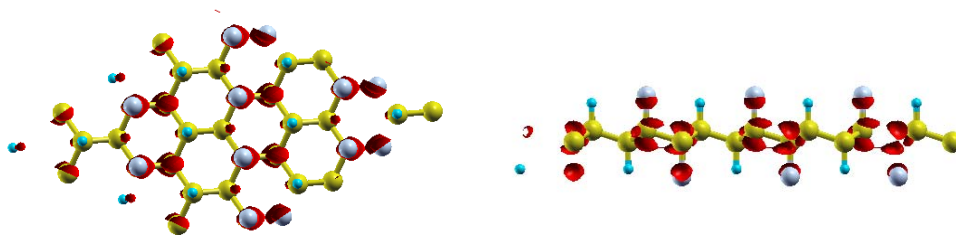

**Figure S7.** Density of CBM at the k-point between  $\Gamma$  and M for the 50% fluorinated graphane (configuration 50-c).

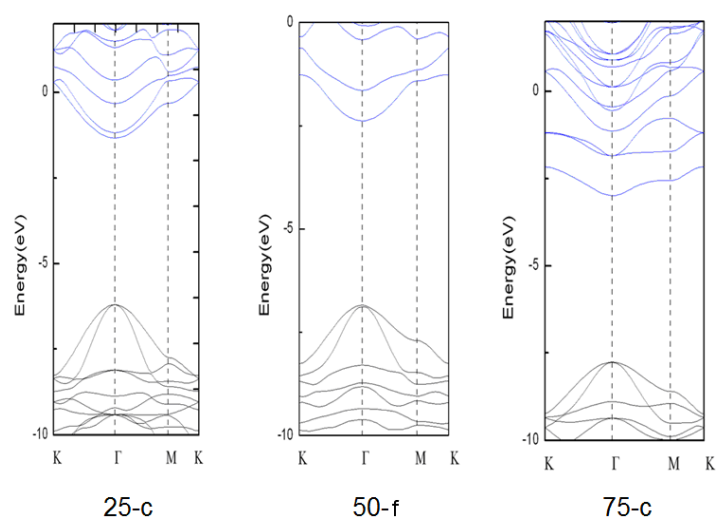

**Figure S8.** Band structure of 25-c, 50-f, 75-c fluorinated graphane from left to right respectively.

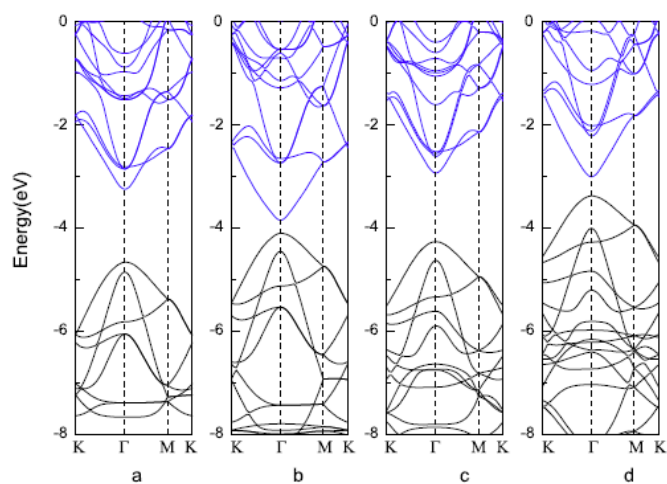

**Figure S9.** Band structure of (a) 50% and (b) 100% OH covered or (c) 50% and (d) 100%  $\text{NH}_2$  covered planar polysilane.

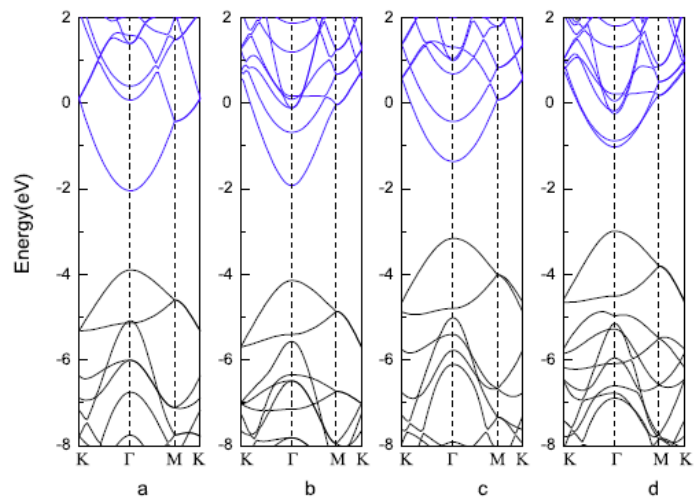

**Figure S10.** Band structure of (a) 50% and (b) 100% OH covered or (c) 50% and (d) 100% NH<sub>2</sub> covered graphane.

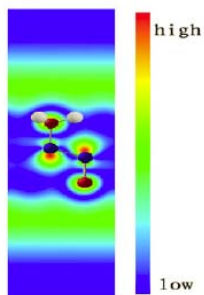

**Figure S11.** CBM density in 100% NH<sub>2</sub> covered graphane.
